# Supplementary material
Source: HighWire-hosted journal article supplement (https://erj.ersjournals.com/content/55/5/2000207)
Supplement: inline-supplementary-material-1 [file inline-supplementary-material-1.pdf]

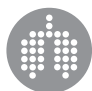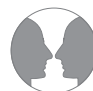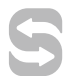

SHAREABLE PDF

# What constitutes a “clinically significant” bronchodilator response in children?

Fatma Guezguez<sup>1,2</sup> and Helmi Ben Saad <sup>1,2,3</sup>

**Affiliations:** <sup>1</sup>Laboratory of Physiology and Functional Explorations, Farhat HACHED Hospital, Sousse, Tunisia. <sup>2</sup>Heart Failure (LR12SP09) Research Laboratory, Farhat HACHED Hospital, Sousse, Tunisia. <sup>3</sup>Université de Sousse, Faculté de Médecine de Sousse, Laboratoire de Physiologie, Sousse, Tunisia.

**Correspondence:** Helmi Ben Saad, Laboratory of Physiology, Faculty of Medicine of Sousse, Street Mohamed Karoui, Sousse 4000, Tunisia. E-mail: helmi.bensaad@rns.tn

 @ERSpublications

The worldwide disagreement with regard to what constitutes a “clinically significant” BDR has long been a source of confusion for clinicians and can hinder an appropriate asthma diagnosis and therefore “disturb” its management <http://bit.ly/2VONQhR>

**Cite this article as:** Guezguez F, Ben Saad H. What constitutes a “clinically significant” bronchodilator response in children?. *Eur Respir J* 2020; 55: 2000207 [<https://doi.org/10.1183/13993003.00207-2020>].

This single-page version can be shared freely online.

## To the Editor:

We read with great interest the recent paper of DE JONG *et al.* [1] evaluating the contribution of a detailed history and a variety of diagnostic tests, including spirometry and bronchodilator tests, to diagnosing asthma in 111 children. In the methodology section, with regard to their definition of a “clinically significant” bronchodilator responsiveness (BDR), the authors only considered the forced expiratory volume in 1 s (FEV<sub>1</sub>) and applied the following two thresholds:  $\geq 10\%$  increase (no reference was cited) and  $\geq 12\%$  increase (according to the National Institute for Health and Care Excellence (NICE) [2]). Their approach could be a source of confusion for at least three reasons.
